# Supplementary material
Source: publisher site journal article supplement (https://www.dovepress.com/get_supplementary_file.php?f=411729.docx)
Supplement: Supplementary file 1 [file get_supplementary_file.php]

**Appendix 1: The Thematic Framework for Qualitative Analysis**

**Theme 1:** **Emotional and Behavioral Changes of Firstborn Children during TTS**

1.1 Emotional changes of firstborn children during TTS

1.1.1 Before the birth of the second child (during pregnancy)

1.1.1.1 Positive emotional expression or change

1.1.1.2 Negative emotional expression or change

1.1.2 Two months after the birth of the second child

1.1.2.1 Positive emotional expression or change

1.1.2.2 Negative emotional expression or change

1.1.3 Twelve months after the birth of the second child

1.1.3.1 Positive emotional expression or change

1.1.3.2 Negative emotional expression or change

1.2 Behavioral changes of firstborn children during TTS

1.2.1 Before the birth of the second child (during pregnancy)

1.2.1.1 Positive behavioral expression or change

1.2.1.2 Negative behavioral expression or change

1.2.2 Two months after the birth of the second child

1.2.2.1 Positive behavioral expression or change

1.2.2.2 Negative behavioral expression or change

1.2.3 Twelve months after the birth of the second child

1.2.3.1 Positive behavioral expression or change

1.2.3.2 Negative behavioral expression or change

**Theme 2: Reasons for Emotional or Behavioral Changes in Firstborn Children**

2.1 Personal factors

2.1.1 Character

2.1.2 Age

2.2 Family factors

2.2.1 The arrival of the second child

2.2.2 Family education

2.3.3 Family relationships or atmosphere

2.3 Other factors

**Theme 3: Measures Taken by Parents and Their Effects**

3.1 Measures taken by parents

3.2 The performances or effects of firstborn children after the implementation of measures

**Theme 4: Parenting Experiences and Lessons for Firstborn Children**

4.1 Relevant experiences in the raising of firstborn children

4.2 Related lessons in parenting firstborn children

**Appendix 2: Supplementary Tables**

**Table S1** Comparison of characteristics between retained and lost subjects during follow-up

| Characteristics | | 1st follow-up | | | | | | |  | 2nd follow-up | | | | | |
| --- | --- | --- | --- | --- | --- | --- | --- | --- | --- | --- | --- | --- | --- | --- | --- |
| Retained subjects  N=72 | Lost subjects  N=25 | | Z/χ2 | | | P | Retained subjects  N=60 | | Lost subjects  N=37 | Z/χ2 | P | |
| Firstborn’s age at baseline, Mean (SD), years | | 3.04(1.02) | 2.89(0.80) | | 0.670 | | | 0.504 |  | | 2.92(0.89) | 3.13(1.09) | -1.060 | 0.292 | |
| Mothers’ age at baseline, Mean (SD), years | | 30.11(2.82) | 30.40(3.20) | | -0.426 | | | 0.671 |  | | 30.07(2.97) | 30.38(2.82) | -0.511 | 0.610 | |
| Gender | |  |  | |  | | |  |  | |  |  |  |  | |
| Boys, n (%) | | 29(40.85) | 16(64.00) | | 3.981 | | | 0.046 |  | | 28(46.67) | 17(47.22) | 0.003 | 0.958 | |
| Girls, n (%) | | 42(59.15) | 9(36.00) | |  | | |  |  | | 32(53.33) | 19(52.78) |  |  | |
| Temperament types | |  |  | |  | | |  |  | |  |  |  |  | |
| Easy to maintain, n (%) | | 67(93.06) | 23(92.00) | | 0.578 | | | 1.000* |  | | 55(91.67) | 35(94.59) | 1.832 | | 0.413* | |
| Difficult to maintain, n (%) | | 3(4.17) | 1(4.00) | |  | | |  |  | | 2(3.33) | 2(5.41) |  |  | |
| Slow to start, n (%) | | 2(2.78) | 1(4.00) | |  | | |  |  | | 3(5.00) | 0(0) |  |  | |
| Family Type | |  |  | |  | | |  |  | |  |  |  |  | |
| Nuclear families, n (%) | | 7(9.72) | 3(12.00) | <0.001 | | | 1.000# | |  | | 5(8.33) | 5(13.51) | 0.222 | 0.637# | |
| Extended families, n (%) | | 65(90.28) | 22(88.00) | |  | | |  |  | | 55(91.67) | 32(86.49) |  |  | |
| Parental relationship | |  |  | |  | | |  |  | |  |  |  |  | |
| Good, n (%) | | 41(56.94) | 12(48.00) | 0.599 | | 0.439 | | |  | | 33(55.00) | 20(54.05) | 0.008 | 0.928 | |
| Moderate, n (%) | | 31(43.06) | 13(52.00) | |  | | |  |  | | 27(45.00) | 17(45.95) |  |  | |
| Mother-child relationship | |  |  | |  | | |  |  | |  |  |  |  | |
| Good, n (%) | | 59(84.00) | 21(81.94) | | <0.001 | | 1.000# | |  | | 49(83.78) | 31(81.67) | 0.071 | 0.790 | |
| Moderate, n (%) | | 13(16.00) | 4(18.06) | |  | | |  |  | | 11(16.22) | 6(18.33) |  |  | |
| Father-child relationship | |  |  | |  | | |  |  | |  |  |  |  | |
| Good, n (%) | 50(69.44) | | 15(60.00) | | 0.749 | | 0.387 | |  | | 40(66.67) | 25(67.57) | 0.008 | 0.927 | |
| Moderate, n (%) | | 22(30.56) | 10(40.00) | |  | | |  |  | | 20 (33.33) | 12(32.43) |  |  | |
| Family atmosphere | |  |  | |  | | |  |  | |  |  |  |  | |
| Good, n (%) | | 19(26.39) | 7(28.00) | | 0.025 | | 0.875 | |  | | 14(23.33) | 12(32.43) | 0.926 | 0.366 | |
| Moderate, n (%) | | 53(73.61) | 18(72.00) | |  | | |  |  | | 46(76.67) | 25(67.57) |  |  | |
| Maternal parenting style | |  |  | |  | | |  |  | |  |  |  |  | |
| Democratic, n (%) | | 61(84.72) | 22(88.00) | | 0.005 | | 0.943# | |  | | 49(81.67) | 34(91.89) | 1.938 | 0.164 | |
| Non-democratic, n (%) | | 11(15.28) | 3(12.00) | |  | | |  |  | | 11(18.33) | 3(8.11) |  |  | |
| Paternal parenting style | |  |  | |  | | |  |  | |  |  |  |  | |
| Democratic, n (%) | | 49(68.06) | 16(64.00) | | 0.016 | | 0.901 | |  | | 41(68.33) | 24(64.86) | 0.125 | 0.724 | |
| Non-democratic, n (%) | | 23(31.94) | 9(36.00) | |  | | |  |  | | 19(31.67) | 13(35.14) |  |  | |
| Annual household income | |  |  | |  | | |  |  | |  |  |  |  | |
| ≤240,000￥, n (%) | | 47(66.20) | 17(68.00) | | 0.027 | | 0.869 | |  | | 39(66.10) | 25(67.57) | 0.022 | 0.882 | |
| >240,000￥, n (%) | | 24(33.80) | 8(32.00) | |  | | |  |  | | 20(33.90) | 12(32.43) |  |  | |
| Maternal education | |  |  | |  | | |  |  | |  |  |  |  | |
| Senior high school and below, n (%) | | 6(8.33) | 1(4.00) | | 0.074 | | 0.785# | |  | | 3(5.00) | 4(10.81) | 0.446 | 0.503# | |
| College and above, n (%) | | 66(91.67) | 24(96.00) | |  | | |  |  | | 57(95.00) | 33(89.19) |  |  | |
| Father's education | |  |  | |  | | |  |  | |  |  |  |  | |
| Senior high school and below, n (%) | | 8(11.11) | 3(12.00) | <0.001 | | | 1.000# | |  | | 7(11.67) | 4(10.81) | <0.001 | 1.000# | |
| College and above, n (%) | | 64(88.89) | 22(88.00) | |  | | |  |  | | 45(75.00) | 29(78.38) |  |  | |

**Note:** * Fisher Exact Test; # Continuous Modified Chi-Squared

**Table S2** Comparison of baseline emotional and behavioral scores between retained subjects and lost subjects during follow-up

| Scores | 1st follow-up | | | |  | 2nd follow-up | | | |
| --- | --- | --- | --- | --- | --- | --- | --- | --- | --- |
| Retained subjects N=72 | Lost subjects N=25 | Z | P | Retained subjects N=60 | Lost subjects N=37 | Z | P |
| Emotionally Reactive, Mean (SD) | 1.54(1.73) | 1.68(1.91) | -0.265 | 0.791 |  | 1.53(1.83) | 1.65(1.69) | -0.658 | 0.511 |
| Anxious/ Depressed, Mean (SD) | 2.29(1.62) | 2.64(2.25) | -0.306 | 0.760 |  | 2.27(1.96) | 2.57(1.52) | -1.176 | 0.240 |
| Somatic Complaints, Mean (SD) | 1.86(1.79) | 2.52(2.54) | -1.117 | 0.264 |  | 1.92(2.09) | 2.22(1.89) | -1.074 | 0.283 |
| Withdraw, Mean (SD) | 1.79(1.93) | 1.80(1.94) | -0.017 | 0.986 |  | 1.62(1.90) | 2.08(1.95) | -1.397 | 0.162 |
| Sleep Problem, Mean (SD) | 2.92(2.35) | 2.64(2.25) | -0.552 | 0.581 |  | 2.75(2.38) | 3.00(2.24) | -0.817 | 0.414 |
| Attention Problems, Mean (SD) | 2.22(1.89) | 2.16(1.95) | -0.201 | 0.841 |  | 2.03(1.89) | 2.49(1.89) | -1.267 | 0.205 |
| Aggressive Behavior, Mean (SD) | 7.89(5.35) | 8.88(6.95) | -0.194 | 0.846 |  | 8.15(6.05) | 8.14(5.40) | -0.339 | 0.735 |
| Internalization Problems, Mean (SD) | 7.49(5.71) | 8.64(7.04) | -0.463 | 0.643 |  | 7.33(6.29) | 8.51(5.68) | -1.407 | 0.159 |
| Externalization Problems, Mean (SD) | 10.11(6.85) | 11.04(8.64) | -0.070 | 0.944 |  | 10.18(7.59) | 10.62(6.95) | -0.602 | 0.547 |
| Total Problems, Mean (SD) | 20.51(13.46) | 22.32(17.1) | -0.066 | 0.947 |  | 20.27(15.11) | 22.14(13.31) | -0.974 | 0.330 |

**Table S3** Basic information on the interviewed family

| ID | Basic information of mother | | | | Gender of firstborn | Age of firstborn, years | Gender of the second child |
| --- | --- | --- | --- | --- | --- | --- | --- |
| Gestational weeks, weeks | Age | Occupation | Education |
| IDI-1 | 39 | 31 | Health care | Junior college and Undergraduate | Girl | 5.3 | Girl |
| IDI-2 | 34 | 28 | Stay-at-home mom | Junior college and Undergraduate | Girl | 4.0 | Boy |
| IDI-3 | 38 | 31 | Engineering technicians | Junior college and Undergraduate | Girl | 2.8 | Boy |
| IDI-4 | 32 | 36 | Teacher | Junior college and Undergraduate | Girl | 2.9 | Boy |
| IDI-5 | 35 | 34 | Teacher | Master degree | Boy | 5.3 | Boy |
| IDI-6 | 34 | 32 | Social service staff | Junior college and Undergraduate | Boy | 4.0 | Girl |
| IDI-7 | 35 | 31 | Engineering technicians | Junior college and Undergraduate | Girl | 4.8 | Girl |
| IDI-8 | 34 | 33 | Management of state-owned enterprises | Junior college and Undergraduate | Girl | 3.2 | Boy |
| IDI-9 | 33 | 28 | Stay-at-home mom | Junior college and Undergraduate | Girl | 4.1 | Boy |
| IDI-10 | 34 | 30 | Health care | Junior college and Undergraduate | Boy | 4.8 | Girl |
| IDI-11 | 34 | 26 | Health care | Junior college and Undergraduate | Boy | 3.3 | Boy |
| IDI-12 | 33 | 31 | Social service staff | Junior college and Undergraduate | Boy | 3.6 | Boy |
| IDI-13 | 37 | 32 | Teacher | Junior college and Undergraduate | Boy | 5.0 | Boy |
| IDI-14 | 34 | 32 | Stay-at-home mom | Junior college and Undergraduate | Girl | 5.8 | Girl |

**Appendix 3: Citation Boxes**

**Box 1** Citation: Mother's description of emotion changes in firstborn children

**Mother's description of emotion changes in firstborn children** **before the birth of second child**

**Positive emotions increase**

ID IDI-11 (3.3 years old, boy)

Q: When you told your firstborn child that he was going to be a brother, what was he like?

A: When I was pregnant, I told him I had a sister in my tummy... I think he's a little excited.

ID IDI-14 (5.8 years old, girl)

Q: Before your second child was born, when you told your child that she was going to be a sister, how did she feel?

A: I think it's ok... She was glad.

**Negative emotions increase**

ID IDI-7 (4.8 years old, girl)

Q: How did the firstborn child's emotion change before the birth of the second child?

A: Before the second child was born, the baby was quite resistant.

ID IDI-9 (4.1 years old, girl)

Q: How did the eldest child's emotion change before the birth of his second child?

A: There was a bad mood at first...Around the time of birth, she had a little anxiety.

**Mother's description of emotion changes in firstborn children at 1st follow-up**

ID IDI-9 (4.1 years old, girl)

Q: Did the firstborn child have a few changes in mood in the past year since her brother was born?

A: Yes, I spent a lot of my energy taking care of the second baby... The older baby was still a little sad.

ID IDI-11 (3.3 years old, boy)

A: At that time, he was very rebellious. There are a lot of things in life that you ask him to do, and he won't do it. He always did the opposite of what you want, trying to get your attention anyway.

**Mother's description of emotion changes in firstborn children at 2nd follow-up**

**Positive emotions increase**

ID IDI-7 (4.8 years old, girl)

Q: Between the younger brother's half year old and one year old, did she have any emotional changes, compared with before?

A: She still loves her sister.

ID IDI-9 (4.1 years old, girl)

Q: You said she became more independent. When did that happen after her brother was born?

A: The most obvious thing is that, in recent months, when she went to kindergarten, she was totally different from before. She didn't cry or make a scene. Anyway, she was happy every day and came to school or back from school happily.

**Negative emotions increase**

ID IDI-4 (2.9 years old, girl)

Q: Were there any changes in child's emotion?

A: I think she was very anxious sometimes in the past.

ID IDI-10 (4.8 years old, boy)

Q: Were there any changes in child's emotion?

A: I consulted his kindergarten teacher, and he said that the child lacked a sense of security... He gave me the impression that he was deeply wronged and was crying.

**Box 2** Citation: Mother's description of behavior changes in firstborn children

**Mother's description of behavior changes in firstborn children before the birth of second child**

ID IDI-1 (5.3 years old, girl)

Q: Did your older child have any behavioral changes during her pregnancy?

A: I remember one that really surprised me was when I was coming down the stairs and she reminded me to be careful, not to fall, not to drop my brother…

ID IDI-2 (4.0 years old, girl)

A: She just kept asking when mom would be home and when the baby would be born.

**Mother's description of behavior changes in firstborn children at 1st follow-up**

**Positive behavior increase**

ID IDI-1 (5.3 years old, girl)

Q: Can you give some examples of changes in the behavior of first-born children in the first two months after the birth of their second child?

A: Like when she went to get her sister's diapers... gave her bottle feeding. Sometimes when my sister cried, she would call me to see it.

ID IDI-9 (4.1 years old, girl)

A: She was very protective of her brother. For example, if someone wants to take her brother away, she watches over her brother even if she doesn't eat.

**Negative behavior increase**

ID IDI-3 (2.8 years old, girl)

Q: Do you think there were any changes in the firstborn child's behavior after the birth of the second child?

A: Maybe it was about a month after the birth of her second child. Especially after we came back from the hospital, she became attached to her father and didn't want her father to hold her brother. Then, if her father or grandmother held her brother... She was about to cry.

ID IDI-8 (3.2 years old, girl)

Q: Do you think there has been any change in her behavior since her brother was born?

A: Yes, she would imitate her brother.

Q: Can you describe it for us?

A: Because her brother was so young, he cried and rode in the stroller. Now she often gets into his stroller, lies in the stroller and cries, faking crying, asking adults to hold her and kiss her. She thinks it is very funny, and then she would eat his pacifier.

ID IDI-11 (3.3 years old, boy)

Q: After his brother was born, did he have any changes in his behavior?

A: He was a bit rebellious, trying to get your attention. Even two months after I came back from the hospital, he would beat and grab your brother in front of you, not behind your back, until he saw me angry. If I scold him, he will cry again. Then the toy... The younger brother robbed his toys. He took the electric mosquito coil incense thrown at the younger brother, hit the younger brother's eye and went to the hospital.

**Mother's description of behavior changes in firstborn children at 2nd follow-up**

**Positive behavior increase**

ID IDI-2 (4.0 years old, girl)

Q: Has there been any change in her behavior?

A: On the whole, she still likes the baby very much. For example, I went to the hospital this

morning to massage the baby. When she came back, as soon as I entered the door, she said, "Mommy is back. Is the baby crying?" I said the baby cried. "Did he cry so much?" I said yes. "How long did he cry?" I said I cried for 30 minutes, and she said, "did you try to comfort him? " And I said I comforted him, and she said I'd kiss the baby later.

ID IDI-9 (4.1 years old, girl)

Q: Has there been any change in her behavior in the past year since her brother was born?

A: Yes, sometimes she is more independent.

Q: Can you give me an example? How did you find out?

A: She does a lot of things by herself, like putting on socks, shoes and clothes. Sometimes when she was in a good mood, she does everything by herself.

**Negative behavior increase**

ID IDI-4 (2.9 years old, girl)

Q: Has there been any change in child's behavior? Can you give me some examples?

A: For example, if there is some delicious food, she will never share it with her brother. And I think she showed anxiety at times. Worse still, she sometimes talks in her sleep at night.

Q: Talking in her sleep?

A: Well, she would talk in her sleep. She would yell at me, at her grandmother, at the people closest to her.

ID IDI-11 (3.3 years old, boy)

Q: Are there any changes in children's behavior?

A: He sometimes got jealous of his brother, and then did something rebellious just to get your attention.

Q: Can you give me an example?

A: For example, if I hold my brother and I picked him up and play with him, he would come and push him away. He wanted to hold me and he would sit on my lap.

**Box 3**Citation: Mother's description of influencing factors of emotional and behavioral changes in firstborn children

**Personality and traits**

ID IDI-7 (4.8 years old, girl)

Q: What do you think is the reason for this?

A: I think she's getting wiser as she gets older. Sometimes I think she's too sensible.

ID IDI-8 (3.2 years old, girl)

Q. What are the possible causes of rejection and rebellion in older children?

A. I think one of them may be congenital, because some children's personalities are partly inherited. ​She is more sensitive by nature, so she feels it more easily.

**Family factors**

ID IDI-4 (2.9 years old, girl)

Q: What do you think is the reason for this?

A: Another reason was that her father and I did not get on well. We had quarrelled and fought at home before. The child had seen it with her own eyes, and it may have had some psychological effect upon her. Her dad hit me that time, and then she saw it, and she kind of freaked out, and now she cries whenever anyone says anything about hitting mom.

ID IDI-11 (3.3 years old, boy)

Q: What do you think is the main reason for his changes?

A: Perhaps it was the arrival of his younger brother, for before his birth the family had always revolved around him, and done as he pleased. Part of it was something else, too. A great deal of his behavior was caused by his grandmother doting on him so much that he had to get what he wanted or cry.

**Other factors**

ID IDI-5 (5.3 years old, boy)

Q: What do you think is the reason for this?

A: ​Just because there were two children in our neighbor's house across the street from us. The sister often came to our house to play. Then when the aunt (nanny) took him out to play, she said that the children around him play better with partners in the community… Who have a younger brother or sister, then he began to have a little envy, and then slowly more accept.

**Box 4** Citation: Mother's description of treatment measures and effects of firstborn children's bad emotion and behavior and suggestions

**Treatment measures and effects of** **firstborn children's bad emotion and behavior**

ID IDI-1 (5.3 years old, girl)

Q: How did you react to the situation? How did you communicate with her, when she said you liked her sister and didn't like her?

A: We would say that we all love you, because mom gave birth to both of you and she. But the sister is so small, you are her older sister, and you have to take care of her. She is your younger sister, and when she grows up, she can play with you. And then she'll listen, and she'll seem to understand.

Q: In this case, how did you communicate with her?

A: I think, as a little kid, she may be sad about it for a while, but it will pass quickly and she will be fine on her own.

ID IDI-3 (2.8 years old, girl)

Q: Did you do anything about her change?

A: Just, she asks us to hold her, so we do it. Usually, we give her what she wants first, because she wants it for her own sake... I don't want her to feel like she's being left out just because she has a brother.

Q: What was the effect?

A: The effect is very good, instant results.

ID IDI-4 (2.9 years old, girl)

Q: Did you have any reaction to her change? Have any measures been taken?

A: I thought the child might be a little insecure for a variety of reasons, so I wanted to give her a sense of security and remind her father, because he has a bad temper. Her dad has hyperthyroidism, and he had a seizure for a while, and he didn't take his medication to control it... A little grumpy. I asked her father to control his temper, as baby gets older, if you don't change it, which will have a great influence on our child's growth and character... so I hope to try to create a more harmonious family atmosphere for children.

Q: Is that improving the situation?

A: It's a little better, because we take her out every weekend to hang out or eat... These problems are slowly improving. After I talked to her father, we both worked hard to change.

**Suggestions**

ID IDI-4 (2.9 years old, girl)

Q: Do you have any Suggestions to share with us in dealing with the relationship between the firstborn and the second-born children?

A: I think... Based on my experience, first of all, there must be justice. There must be the same love and punishment for the two children... I think if they grow up in a different kind of love, one of the children will be hurt, and it will affect the relationship between the two children in the family, which is against our original intention.

ID IDI-6 (4.0 years old, boy)

A: My experience is to take care of children's emotions... Try to solve the problem from his point of view.

ID IDI-5 (5.3 years old, boy)

A: I think I act weak in front of the firstborn child. Because I had a hard time getting pregnant, and he saw me throw up very severely. at home every day... Then I would tell him that mom is so hard now and

and very tired. I asked if you could be obedient and sensible, and don't let mom worry any more. I think he is able to understand, and there are times when we can show him how vulnerable an adult is. If you need his support, ask him about it and let him know that he can contribute to the family.

ID IDI-11 (3.3 years old, boy)

A: When I took care of the second child, I would observe the reaction of the older child. If I found him jealous, I would give him some attention... Or when two children have a conflict, as long as it was not a big mistake of principle, we would favor the older child a little bit and let him feel that we still care about him…
